1 **Acceptability of using mobile Health (mHealth) as an intervention tool for People with**  
2 **Drug Use Disorders in Tanga, Tanzania.**

3  
4 Castory Munishi<sup>1\*</sup>, Harrieth P Ndumwa<sup>1</sup>, Josephine E Massawe<sup>1</sup>, Belinda J Njiro<sup>1</sup>, Jackline  
5 Ngowi<sup>1</sup>, Sanita Suhartono<sup>2</sup>, Anja Busse<sup>2</sup>, Giovanna Campello<sup>2</sup>, Giovanna Garofalo<sup>3</sup>, Pietro  
6 Cipolla<sup>3</sup>, Cassian Nyandindi<sup>4</sup>, Omary Ubuguyu<sup>5</sup>, Bruno Sunguya<sup>1</sup>

7  
8 **Affiliations:**

9 <sup>1</sup> Muhimbili University of Health and Allied Sciences, P.O Box 65001, Dar es Salaam,  
10 Tanzania

11 <sup>2</sup> Prevention, Treatment and Rehabilitation Section, United Nations Office on Drugs and  
12 Crime, Vienna, Austria.

13 <sup>3</sup> Association Casa Famiglia Rosetta, Italy

14 <sup>4</sup> Drug Control and Enforcement Authority, P.O. Box 80327 Tanzania

15 <sup>5</sup> Ministry of Health, Dodoma, Tanzania.

16  
17 **\*Corresponding author:**

18 E-mail: [castorymunishi@outlook.com](mailto:castorymunishi@outlook.com)

19  
20 **Email Addresses**

21 CM: [castorymunishi@outlook.com](mailto:castorymunishi@outlook.com)

22 HPN: [harrieth.peter@gmail.com](mailto:harrieth.peter@gmail.com)

23 JEN: [jacklinengowi64@gmail.com](mailto:jacklinengowi64@gmail.com)

24 BJN: [belindaj.njiro@gmail.com](mailto:belindaj.njiro@gmail.com)

25 JE: [joyephraim10@gmail.com](mailto:joyephraim10@gmail.com)

26 SS: [sanita.suhartono@un.org](mailto:sanita.suhartono@un.org)

27 AB: [anja.busse@un.org](mailto:anja.busse@un.org)

28 GC: [giovanna.campello@un.org](mailto:giovanna.campello@un.org)

29 GG: [garofalo@casarosetta.it](mailto:garofalo@casarosetta.it)

30 PC: [pietro.cipolla@icloud.com](mailto:pietro.cipolla@icloud.com)

31 CN: [cnyandindi@gmail.com](mailto:cnyandindi@gmail.com)

32 OU: [oubuguyu@gmail.com](mailto:oubuguyu@gmail.com)

33 BS: [sunguya@muhas.ac.tz](mailto:sunguya@muhas.ac.tz)

34  
35 **Total Number of words: 5681**

36

37

## 38 ABSTRACT

39 **Background:** With the increasing numbers of people with drug use disorders (PWDUD) in  
40 Tanzania as in other parts of the world the need for innovative interventions specifically  
41 tailored for this population has increased. Tanga, a coastal region on the Northeast of Tanzania  
42 has the second highest number of PWDUD in Tanzania. Evidence on the additional benefit in  
43 treatment and recovery process among PWDUD using digital health interventions is lacking.  
44 This study aimed to describe the acceptability of using a digital intervention to increase  
45 information access for PWDUD in Tanga region, Tanzania.

46 **Methods:** A cross-sectional descriptive study using both quantitative and qualitative  
47 approaches was conducted in Tanga Municipality and Muheza District. The quantitative  
48 approach used face to face interviews with a pre-tested questionnaire with 465 participants,  
49 while the quantitative method was carried out through In-Depth Interviews with 12 participants  
50 by the saturation point. Analysis was done descriptively to generate frequencies, cross  
51 tabulations, and chi-square test used to examine associations between categorical variables.  
52 Thematic analysis using codes was used to analyze qualitative data.

53 **Results:** Majority of the PWDUD 67.6% do not own mobile phones. Out of the 156  
54 participants with mobile phones, only 6.4% owned a smartphone. Most of the participants,  
55 83.6%, reported to live with someone who owns a mobile phone. Importantly, a significant  
56 number of participants, 98.5% from both areas showed readiness to use mobile phones to  
57 access information about the harmful use of substance and substance use disorder treatment  
58 options. Participants described how mobile phones can be useful to them in accessing  
59 information related to treatment and access to treatment options. The reasons they gave for not  
60 owning mobile phones included the need of money to buy drugs and the lack of money to buy  
61 credit drives them to sell their phones. A digital app called [Huru app](#) was developed during  
62 study as part of an information sharing campaign on substance use.

63 **Conclusion and recommendations:** The findings of this study helped to inform the target  
64 audience for the developed Huru app that should not be only PWDUD but the community at  
65 large. Despite the participants having expressed high readiness to use mobile phones to access  
66 drug use disorder treatment information, only few of them were found to own mobile phones  
67 but reported to live with family members who own mobile phones. Thus, a mobile phone  
68 intervention should also target their family members who are key in supportive treatment.

69 **Key Words:** Drug use, Drug Use Disorder, mHealth, Tanga, Tanzania

## 70 **Introduction**

71 About a quarter of the 269 million people who used drugs at least once in their lifetime were  
72 from the African continent by 2020 (1). Both ageing and population growth are projected to  
73 increase the burden of mental health and substance use disorders by 130% in 2050 (2). Such  
74 unprecedented burden significantly increases the need for drug use preventive interventions.  
75 Tanzania harbor between 25,000 – 50,000 people who inject drugs (PWID) (3). Tanga, a  
76 Northeastern region of Tanzania is estimated to have around 25 hotspots of people with drug  
77 use disorder (PWDUD) with around 5000 males and 190 females (4). The number of PWDUD  
78 per 100,000 people aged 15 years and older in Tanga is reported to be 452, of which 47 are  
79 PWID (4). Due to unsafe injecting practices and engaging in unprotected sex, these people are  
80 at a higher risk of getting and transmitting Human Immunodeficiency Virus (HIV), blood borne  
81 infections such as Hepatitis C and other sexually Transmitted Infections (STIs) (5).

82 The increased use of mobile technologies such as smart phones has provided an opportunity  
83 for creating innovative solutions to address healthcare challenges (6). Digital interventions for  
84 drug use have been increasing at a quick pace over the past decade (7). They can complement  
85 practitioners-delivered interventions by offering information, monitoring and behavioral  
86 support to the clients. Further, they are often cost-effective with the potential to improve  
87 uptake, efficiency, and clinical effectiveness of the interventions (8,9).

88 Sub Saharan African countries like Tanzania are experiencing a large explosion of internet use  
89 where in the last decade the number of mobile subscribers and connections has quadrupled  
90 (10). Despite this massive potential, there is little utilization of digital interventions in  
91 Tanzanian healthcare (11). Such interventions may also be useful in addressing the gap in care  
92 and treatment of PWDUD in Tanzania. This study, therefore, aimed to describe the  
93 acceptability of using mobile health (mHealth) intervention among people who use drugs in  
94 Tanga region, Tanzania. The findings of this study may be useful in scaling up such efforts in  
95 addressing the growing burden of drug use, strained health system with fewer health workers  
96 to attend the clients, and high health care cost in the context of epidemiological transition in  
97 Tanzania.

## 98 **Materials and Methods**

### 99 **Study Design and setting**

100 The study employed a convergent mixed methods design using quantitative and qualitative  
101 approaches to determine the acceptability of using mobile health (mHealth) intervention among  
102 PWDUD in Tanga region, Tanzania from October 2020 to January 2021. A quantitative design  
103 was employed to obtain measurements such as the prevalence of mobile phone use with respect  
104 to demographic characteristics, whereas a qualitative design was employed to obtain a detailed  
105 understanding of the acceptability and feasibility of using mHealth among PWDUD. The study  
106 was conducted in two districts of Tanga Region, Muheza and Tanga City which were chosen  
107 to represent rural and urban settings respectively. Tanga is in North-Eastern part of Tanzania,  
108 bordering Kenya on the North and Indian Ocean on the East, it has a total population of  
109 2,405,205 (12). It is reported to be the second city with the highest number of PWDUD in  
110 Tanzania (4). Muheza district has a population of 204,461 people (12). Tanga City is on the  
111 urban setting, located on the shores of the Indian Ocean in northeast Tanzania with a population  
112 of 273,332 as per 2012 census (12).

### 113 **Study Population and selection**

114 The study included PWDUD with 18 years of age and above. PWDUD who were intoxicated  
115 or suspected to be under influence of drugs at the time of data collection were excluded. The  
116 main services available for PWDUD in Tanga are Methadone Assisted Treatment (MAT) at  
117 Bombo Regional Referral Hospital and privately-operated rehabilitation clinics and sober  
118 houses. In this study, participants were recruited from multiple sites, the streets harboring  
119 hotspots of PWDUD, rehabilitation clinics, sober houses and those who are on MAT.

### 120 **Sampling and sample size**

121 Sample size was computed using Kish and Leslie proportion formula (13). A standard error of  
122 5% and a proportion of 50% was used in estimating the minimum sample size as no similar  
123 studies have been previously conducted in Tanzania to assess the potential of deploying  
124 mHealth intervention among PWDUD. In this study, the minimum sample size computed was  
125 465. Snowball sampling techniques were used to recruit study participants from different  
126 hotspots where PWUD are found in Tanga City and Muheza district. Members of civil society  
127 organizations involved in drug use rehabilitation and well oriented with the locations of PWUD

128 in the two districts aided in reaching the study participants. Participants who met the inclusion  
129 criteria and consented to participate in the study were enrolled. For the qualitative study, we  
130 purposively chose six participants from each district to give further context on the responses  
131 obtained in the quantitative study and hence a total of 12 participants.

### 132 **Data measurements and tools**

133 The structured interviewing forms were used to obtain data on the acceptability of using  
134 mHealth intervention among PWDUD in Tanga. The interviewing forms consisted of two  
135 sections, section one which was on the socio-demographic characteristics of the study  
136 participants and section two which was focused on the mobile phone usage of the study  
137 participants. It had a total of 22 questions, 20 close-ended and two (2) open-ended questions.  
138 The tool was developed in English language and then translated into Swahili; a national  
139 language spoken by majority in the country.

140 The socio-demographic characteristics included sex, age, level of education, literacy skills, and  
141 homelessness. The outcome variable was mobile phone possession which had sub elements  
142 which included the kind of mobile phone owned, whether they live with someone possessing  
143 a mobile phone, can they keep the mobile phone and for how long, tendency of selling mobile  
144 phones owned to get money for buying drugs and other needs, ability to purchase credit and  
145 whether they are willing to use mobile phones to access drug use disorder treatment related  
146 information and services.

147 A pilot study was conducted to pretest the tools before the actual data collection, using  
148 simulated participants who acted to have similar characteristics to the study participants.  
149 Necessary corrections and modification of the instruments were then made to obtain the final  
150 version that was used during the actual data collection.

### 151 **Data Collection**

152 The study utilized both quantitative and qualitative approaches. The quantitative data was  
153 collected by the use of questionnaire, while qualitative data was collected through In-depth  
154 interviews. Information rich participants from identified during quantitative interviews were  
155 recruited for qualitative interviews in order to triangulate data obtained through quantitative  
156 methods and enable the researchers to get an insider perspective and context of mobile phone  
157 use among people with substance use disorder.

158 Quantitative data was collected by a team of 4 trained research assistants in each of the study  
159 districts. The collection took place from October to November 2020 simultaneously in both  
160 districts. The research assistants followed ethical principles in the conduct of the study and  
161 ensured that informed consent was given before starting to interview the participants. The  
162 interviews using questionnaires took about 30 minutes to complete. The interviews were  
163 conducted about 500 meters from the drug hotspot to ensure confidentiality of the respondent.

164 The qualitative approach through In-Depth Interviews explored the acceptability of using  
165 mobile mHealth intervention among PWDUD in Tanga to provide supplemental information  
166 on the quantitative findings. All interviews were conducted in Kiswahili and audio recorded  
167 with the permission of the study participants. Researchers applied the principle of bracketing  
168 to ensure that pre-understanding information do not influence the data. Field notes as a  
169 reflective diary was maintained for enhancement of reliability.

## 170 **Data Management and Analysis**

171 Data collected through the interviewing forms was coded, entered in R statistical software  
172 version 4.0.0, and cleaned before the analysis was done. Numeric and categorical variables  
173 were analyzed using proportions for categorical variables, mean and standard deviation for  
174 numeric variables, and p-values to compare the findings in the two study sites. Socio-  
175 demographic information was summarized in tables and mobile phone use into both tables and  
176 graphs.

177 The qualitative data were analyzed through the thematic analysis framework to explore  
178 perceptions and acceptability of using mobile phones to access drug related information. The  
179 analysis involved six main phases of thematic analysis which included: familiarization with  
180 data, generating initial codes, searching for themes, reviewing themes, defining, and naming  
181 themes, and producing the report (14,15). Microsoft Word program was used to support data  
182 organization, coding, and themes identifications. In producing a report in this study, the data  
183 were presented as summaries and narratives and were illustrated with examples and quotations,  
184 capturing respondents' perspectives and experiences.

## 185 **Ethical Consideration**

186 Ethical clearance was obtained from the MUHAS Institutional Review Board (IRB), MUHAS-  
187 REC-12-2020-438. Permission to conduct the study was obtained from the Permanent

188 Secretary of the Ministry of Health, the Regional Medical Officer of Tanga Region and the  
189 District Medical Officers from Tanga City and Muheza District. Permission to collect data  
190 from Bombo MAT clinic was further obtained from the Medical Officer in Charge and head of  
191 the MAT unit. Consent to participate in the study was sought from the eligible study candidates.  
192 No participant was allowed to participate without going through the consenting process.

## 193 **Results**

### 194 **Socio-demographic Characteristics of the Study participants**

195 A total of 481 participants were enrolled from both Tanga City and Muheza district, with the  
196 response rate of 100%. Three in four study participants were from the urban area (**Table 1**).  
197 The mean age was  $37.7 \pm 7.9$  and was ranging between 20 and 72 years. Most participants were  
198 males 97.5% and single 54.1%. About 71% of the participants had attained primary level of  
199 education. More than three quarters of the participants 79.8% had a home with the majority  
200 40.5% residing with their families. More than half of the participants 59.8% had used drugs for  
201 the first time at the age of 15 to 24 years, with a mean age (SD) of  $24.3 \pm 6$  and, the majority  
202 58.9% had used drugs for the period of more than 10 years (**Table 1**).

203

**Table 1: Socio-demographic characteristics of the study participants N (%)**

204

| Characteristic                      | Total (N=481) | Muheza (N=121) | Tanga (N=360) | P-Value |
|-------------------------------------|---------------|----------------|---------------|---------|
| <b>Sex</b>                          |               |                |               |         |
| Male                                | 469 (97.5)    | 121 (100)      | 348 (96.7)    | 0.09    |
| Female                              | 12 (2.5)      | 0              | 12 (3.3)      |         |
| <b>Age groups</b>                   |               |                |               |         |
| <b>Mean age (SD)</b>                | 37.7 ± 7.8    |                |               |         |
| < 25 years                          | 24 (5.0)      | 9 (7.4)        | 15 (4.2)      | 0.556   |
| 25-34 years                         | 182 (37.9)    | 45 (37.2)      | 137 (38.1)    |         |
| 35-44 years                         | 202 (42.1)    | 50 (41.3)      | 153 (42.5)    |         |
| 41+ years                           | 72 (15.0)     | 17 (14.0)      | 55 (15.3)     |         |
| <b>Marital status</b>               |               |                |               |         |
| Single                              | 260 (54.1)    | 33 (27.3)      | 83 (23.1)     | 0.379   |
| Married                             | 91 (18.9)     | 18 (14.9)      | 73 (20.3)     |         |
| Widowed                             | 14 (2.9)      | 68 (56.2)      | 192 (53.3)    |         |
| Divorced                            | 116 (24.1)    | 2 (1.7)        | 12 (3.3)      |         |
| <b>Education</b>                    |               |                |               |         |
| No Education                        | 23 (4.8)      | 1 (0.8)        | 22 (6.1)      | 0.032*  |
| Primary Level                       | 342 (71.1)    | 85 (70.2)      | 257 (71.4)    |         |
| Secondary and Above                 | 116 (24.1)    | 35 (28.9)      | 81 (22.5)     |         |
| <b>Can Read and Write</b>           |               |                |               | 0.393   |
| Yes                                 | 438 (91.1)    | 113 (93.4)     | 325 (90.3)    |         |
| No                                  | 43 (8.9)      | 8 (6.4)        | 35 (9.7)      |         |
| <b>Has a Home</b>                   |               |                |               | 0.417   |
| Yes                                 | 384 (79.8)    | 93 (76.9)      | 291 (80.8)    |         |
| No                                  | 97 (20.2)     | 28 (23.1)      | 69 (19.2)     |         |
| <b>Residential Status</b>           |               |                |               | 0.086   |
| Alone                               | 54 (12.9)     | 15 (15.5)      | 39 (12.1)     |         |
| With Children                       | 16 (3.8)      | 4 (4.1)        | 12 (3.7)      |         |
| With Family                         | 170 (40.5)    | 27 (27.8)      | 143 (44.3)    |         |
| With Friends                        | 30 (7.1)      | 10 (10.3)      | 20 (6.2)      |         |
| With Wife                           | 27 (6.4)      | 9 (9.3)        | 18 (5.6)      |         |
| With Parents                        | 123 (29.3)    | 32 (33.0)      | 91 (28.2)     |         |
| <b>Age First Used Drugs</b>         |               |                |               | 0.211   |
| < 15 years                          | 19 (4.0)      | 3 (2.5)        | 16 (4.5)      |         |
| 15 – 24 years                       | 287 (59.8)    | 65 (53.7)      | 222 (61.8)    |         |
| 25 – 34 years                       | 156 (32.5)    | 48 (39.7)      | 108 (30.1)    |         |
| 35 + years                          | 18 (3.8)      | 5 (4.1)        | 13 (3.6)      |         |
| <b>Used Drugs for &gt; 10 Years</b> |               |                |               | 0.150   |
| Yes                                 | 282 (58.9)    | 64 (52.9)      | 218 (60.9)    |         |
| No                                  | 199 (41.1)    | 57 (47.1)      | 142 (39.1)    |         |

205

**Table 2: Mobile Phone Possession and Usage Patterns of the Study Participants**



| <b>Characteristic</b>                                     | <b>Total N (%)</b> | <b>Muheza N (%)</b> | <b>Tanga N (%)</b> | <b>P-Value</b> |
|-----------------------------------------------------------|--------------------|---------------------|--------------------|----------------|
| <b>Has a mobile phone</b>                                 |                    |                     |                    |                |
| Yes                                                       | 156 (32.4)         | 18 (14.9)           | 138 (38.3)         | < 0.001*       |
| <b>Kind of mobile phone owned</b>                         |                    |                     |                    |                |
| Both                                                      | 1 (1.3)            | 0 (0.0)             | 2 (1.5)            | 0.850          |
| Feature Phone                                             | 138 (92.0)         | 17 (94.4)           | 121 (91.7)         |                |
| Smart Phone                                               | 10 (6.7)           | 1 (5.6)             | 9 (6.8)            |                |
| <b>Lives with anyone having a mobile phone</b>            |                    |                     |                    |                |
| Yes                                                       | 402 (83.6)         | 102 (84.3)          | 300 (83.3)         | 0.916          |
| <b>Relationship with a person who owns a mobile phone</b> |                    |                     |                    |                |
| Family                                                    | 126 (29.0)         | 40 (35.7)           | 86 (26.6)          | < 0.001*       |
| Friend                                                    | 157 (36.1)         | 55 (49.1)           | 102 (31.6)         |                |
| Mine                                                      | 152 (34.9)         | 17 (15.2)           | 135 (41.8)         |                |
| <b>Uses a mobile phone</b>                                |                    |                     |                    |                |
| Yes                                                       | 417 (86.7)         | 104 (86.0)          | 313 (86.9)         | 0.901          |
| <b>Can keep a mobile phone</b>                            |                    |                     |                    |                |
| Yes                                                       | 444 (92.3)         | 118 (97.5)          | 326 (90.6)         | 0.022**        |
| <b>Duration that can keep a phone</b>                     |                    |                     |                    |                |
| One Day                                                   | 15 (14.2)          | 5 (4.2)             | 10 (2.9)           | 0.742          |
| One Week                                                  | 102 (22.2)         | 3 (2.5)             | 7 (2.1)            |                |
| One Month                                                 | 10 (2.2)           | 29 (24.6)           | 73 (21.4)          |                |
| One Year                                                  | 332 (72.0)         | 81 (68.6)           | 251 (73.6)         |                |
| <b>Has ever sold a phone</b>                              |                    |                     |                    |                |
| Yes                                                       | 351 (73.0)         | 82 (67.8)           | 269 (74.7)         | 0.170          |
| <b>Frequency of selling phones</b>                        |                    |                     |                    |                |
| Once                                                      | 52 (14.2)          | 19 (21.6)           | 33 (11.8)          | 0.082          |
| Twice                                                     | 65 (17.7)          | 17 (19.3)           | 48 (17.2)          |                |
| Thrice                                                    | 43 (11.7)          | 11 (12.5)           | 32 (11.5)          |                |
| More than thrice                                          | 207 (56.4)         | 41 (46.6)           | 166 (59.5)         | 0.629          |
| <b>Able to buy credit</b>                                 |                    |                     |                    |                |
| Yes                                                       | 455 (94.6)         | 116 (95.9)          | 339 (94.2)         |                |
| <b>Frequency of credit purchase</b>                       |                    |                     |                    |                |
| Once                                                      | 104 (22.9)         | 28 (24.6)           | 76 (22.3)          | 0.481          |
| Twice                                                     | 67 (14.7)          | 12 (10.5)           | 55 (16.1)          |                |
| Thrice                                                    | 68 (14.9)          | 16 (14.0)           | 52 (15.2)          |                |
| More than thrice                                          | 216 (47.5)         | 58 (50.9)           | 158 (46.3)         |                |
| <b>Ready to use phone to learn about drugs</b>            |                    |                     |                    |                |
| Yes                                                       | 474 (98.5)         | 121 (100.0)         | 353 (98.1)         | 0.269          |

207 About a one third of the participants 32.4% reported to own mobile phones with more than two  
208 times higher prevalence of ownership in Tanga City as compared to Muheza (38.3% vs. 14.9%)  
209 (**Figure 1**). This shows a statistically significant association ( $p < 0.001$ ) between mobile phone  
210 ownership and urban residence.

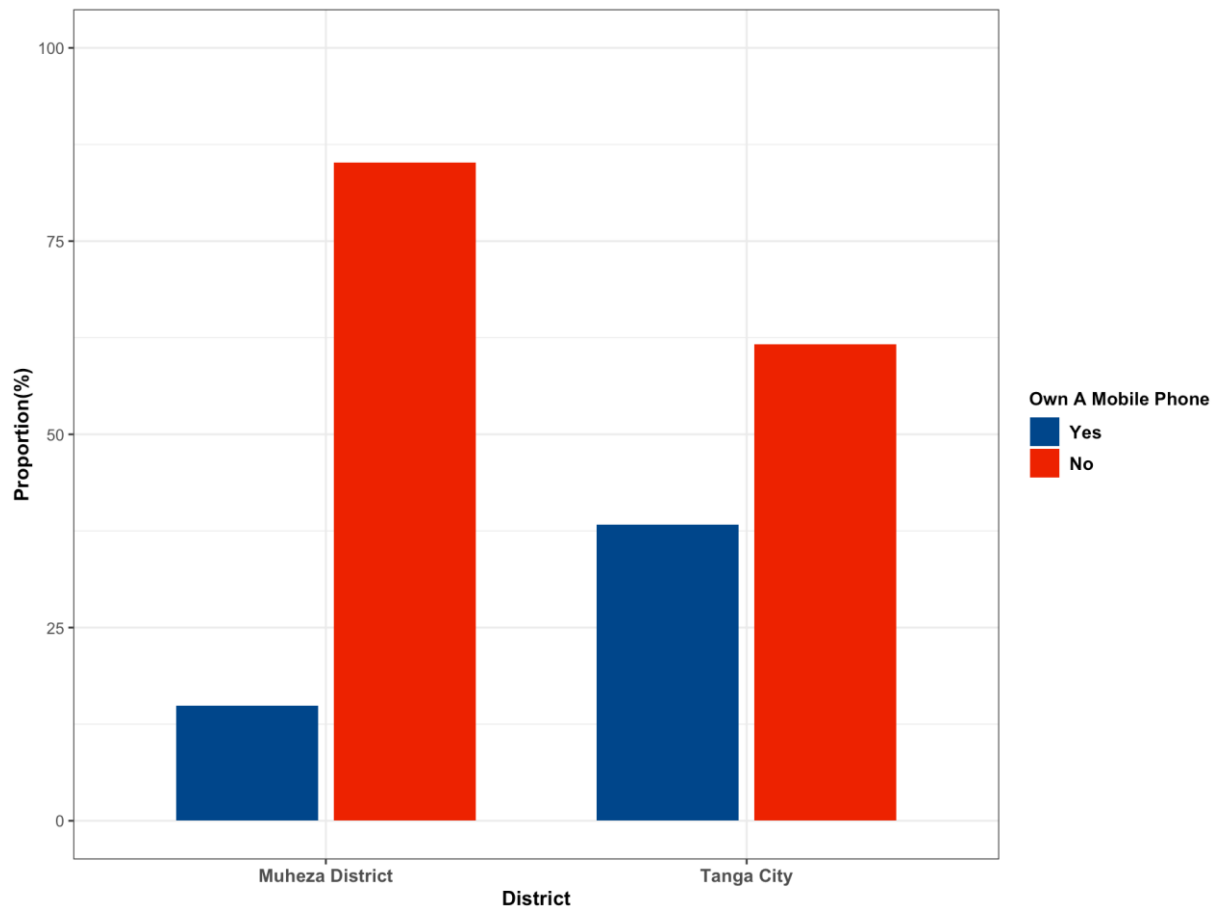

211

212 **Fig 1:** Comparison of Mobile Phone Ownership of Participants from Tanga and Muheza

213 Majority of the participants 92.0% owned feature phones compared to only 6.7% with smart  
214 phones ownership. Mobile phone ownership is further explored in qualitative design in which  
215 participants were interviewed about mobile phone ownership and the ability to maintain mobile  
216 phone ownership. Participants had mixed responses regarding mobile phone ownership, some  
217 stated that they do not own phones because it is expensive, as money is needed to buy credit.  
218 For example, the response from a participant in Muheza:

219 *“No, I don’t have because when you start using drugs it became so hard to get money for*  
220 *buying credit” (Participant No.08, Muheza).*

221 Regarding the ability to maintain mobile phone ownership, quantitative findings revealed that  
222 about three quarters 73% have ever sold their phones when they lack money to purchase drugs  
223 and sustain their drug use. In the same regard over half 56.4% participants stated they have  
224 ever sold a phone they owned more than thrice. This is supported by qualitative findings in  
225 which a respondent stated that they sold their phone to get money for drugs:

226 *“I use phones but sometimes when I have problems, I sell it and use the money for drugs, I*  
227 *can buy another phone again when I get more money, but it has been a while since I used a*  
228 *mobile phone” (Participant No. 9, Muheza)*

229 In general, participants were aware of the importance of mobile phone use in communication,  
230 and they started to be using them for communication such as calling family and friends and  
231 chatting with their friends. Moreover, some participants were aware on the role of mobile  
232 phones in information sharing, like the use of the internet for accessing information. Examples  
233 of quotes from the participants:

234 *“Most of the time I use my phone for calling and chatting with my friends” (Participant No.*  
235 *01, Tanga)*

236 *“Mobile phones are important in communication, to give us different information”*  
237 *(Participant No. 07, Muheza)*

238 *“I am watching YouTube videos on combating drug use” (Participant No. 03, Tanga)*

239 The majority of the participants, 83.6% had access to mobile phones and reported to be living  
240 with a family member, friend or a relative owning a mobile phone. It is also evident from the  
241 interviews as one of the participants said:

242 *“My mother, father and my uncle, they have mobile phones” (Participant No.07, Muheza)*

243 **The use of Mobile phones to access information of drug use**

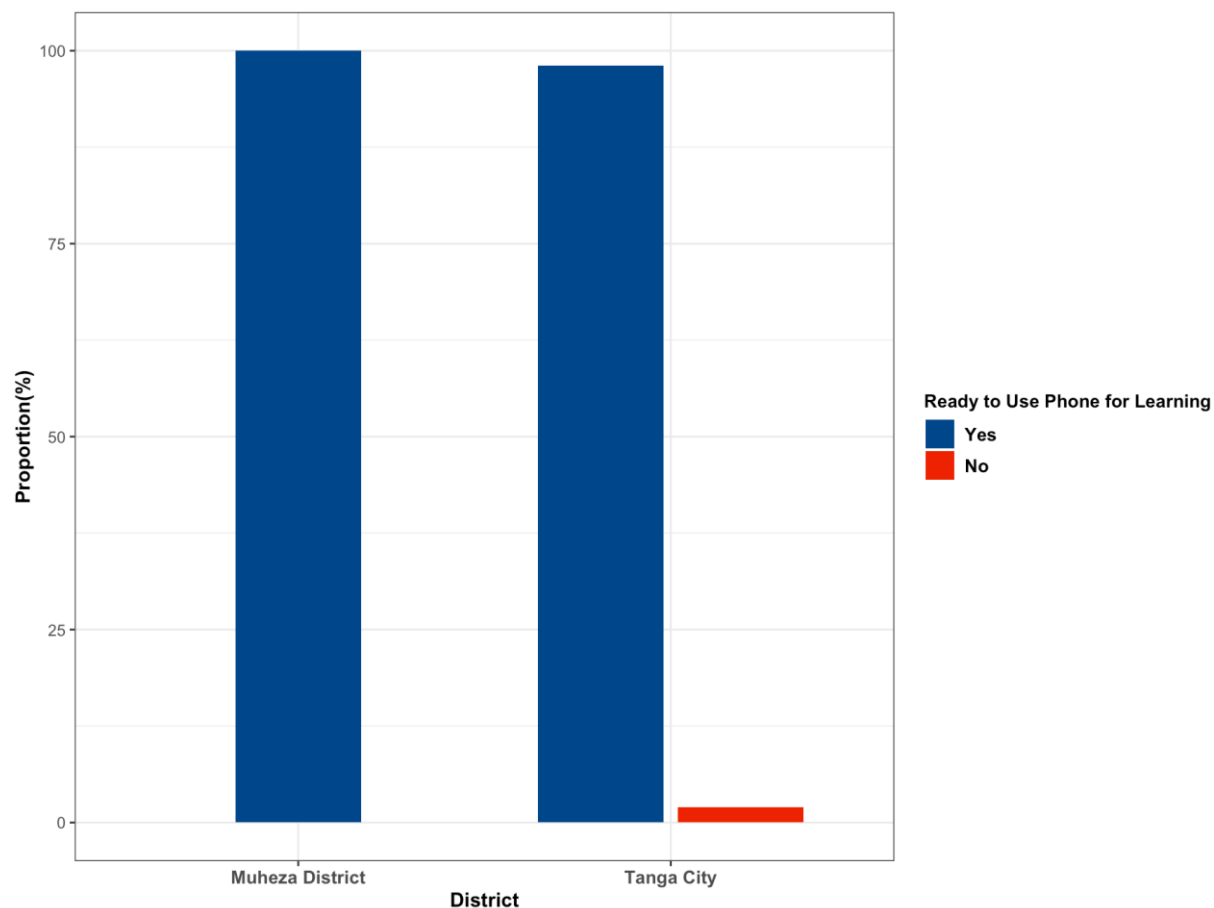

244

245

246 *Fig 2: Comparison of Readiness to Use Mobile Phone for Learning about Substances of*  
247 *Participants from Tanga City and Muheza*

248 The majority of 94.6% of participants reported being able to purchase credit. Additionally, a  
249 significant number of participants, 98.5% from both areas have claimed to be ready to use  
250 mobile phones to access information about overcoming drug use. In Muheza district, all  
251 participants expressed readiness to use mobile phone to access information and for Tanga City  
252 98.1% of the participants expressed readiness (**Figure 2**). This can also be evident from the  
253 interviews as participants were asked to respond on how they use their mobile phones and some  
254 of the responses were;

255 *“Mobile phones can give a lot of what you want; internet, you can learn about methadone,*  
256 *consequences of drug abuse and about relapse” (Participant No. 03, Tanga)*

257 *“...because we can get educated through mobile phones” (Participant No. 02, Tanga)*

258 Some participants indicated mobile phones can be useful for those who can read and write in  
259 accessing information but not for all, they suggested that there should be information centers  
260 in the streets which can offer free education to those who cannot read and write.

261 *“Yes, they can help especially for those who can read and write and those who can use mobile  
262 phones but for those who cannot be given information directly, also there should be centers or  
263 institutions where they will be provided with education” (Participant No. 11, Muheza)*

264 Another participant agreed that mobile phones could be useful, but went on further to state that  
265 they feel that there is the need of a human component in supporting their recovery. Even if  
266 there is a mobile app, there should be people who they can communicate well with and get to  
267 express their feelings and challenges. This shows that if there is a digital intervention for  
268 PWDUD it should be supported with a physical information center where people can call in  
269 through the app and they can also go directly to these centers to seek for further help.

270 *“Yes, it might be helpful though whether they will throw on the internet questions and write to  
271 us things that are like a lesson for us users, it would be better to communicate with us directly,  
272 because when someone stops drug use they need to belong somewhere as starting point of  
273 getting back to the community.....” (Participant No.04, Tanga)*

274 Some of the participant responses also indicated the importance of having small clips in the  
275 apps, they found that information through videos can be easy to grasp and understand but also  
276 they do not require one to be able to read and write in order to get the message.

277 *“Of course, when you have the apps and small clips, it can help as videos are interesting and  
278 they do not require you to be able to read and write to understand them” (Participant No. 04,  
279 Tanga)*

280 On the contrary, some participants expressed concerns regarding usefulness of mobile phones  
281 in helping them to quit drug use they felt that information through mobile phones may not be  
282 enough to help them quit they need more support like the human component which has been  
283 reported earlier.

284 *“That will be hard for me because you may give me information through the phone but  
285 sometimes, I may be in need of things that may help me stop, we need people to talk to and to  
286 support us to quit” (Participant No. 05, Tanga)*

287 Further some participants believed that drug use disorder treatment cannot only be provided  
288 through a mobile intervention, as treatment needs to be tailored to the individual's needs. They  
289 thus think that in addition to the app, qualified health professionals, family members, peers and  
290 their communities are part of the whole support system to support the treatment and recovery  
291 of people with drug use disorders.

292 *“A mobile phone cannot make me stop using drugs because this is something that a person*  
293 *should decide from his/ her own heart that now I want to stop using drugs, but this is always*  
294 *hard due to the withdraw pains that a person get hence we fail to stop” (Participant No.09,*  
295 *Muheza)*

296 *Huru App*

297 *After successful completion of the study, a web and android application called [Huru app](#) was*  
298 *developed. The app was available to mobile phone and web users in Tanga City and Muheza*  
299 *districts as a complementary to the tradition Information, Education and Communication*  
300 *(IEC) materials during a campaign which was titled “Awareness in a caring community”.*

## 301 **Discussion**

302 Two thirds of People with Drug Use Disorders in Tanga region did not own mobile phones,  
303 and only 10 participants were found to own smartphones. Almost three quarters of the PWDUD  
304 were found to be able to keep their mobile phones for more than a year. Importantly, PWDUD  
305 from both areas are also found to show readiness in using mobile phones to access information  
306 about the harmful use of substances and substance use disorder treatment options. A higher  
307 proportion of the participants (83.6%) reported to live with someone who own a mobile phone  
308 which helped to inform the intervention that was the outcome of this study that the intervention  
309 was designed such that the developed app can be used by PWUD along with community  
310 members to support them in accessing information about drug use disorder treatment and its  
311 facilities in Tanga and Muheza. Moreover, it was found that the app needs to run by people  
312 who are accessible to PWDUD and there should be information centers in the community  
313 where PWDUD can go and be supported in the recovery process.

314 The low proportion of mobile phone ownership among PWDUD in this study can be explained  
315 by the cost of mobile phone itself (16) but principally due to the consequences of drug use in  
316 most aspects of life, ranging from lack of education, unemployment, poor health, poverty,

317 homelessness, and poor quality of life, making them not able to afford and maintain mobile  
318 phone ownership (17). These findings are contrary to those obtained in a study conducted in  
319 UK to access mobile phone ownership, usage and readiness to use by patients in drug treatment  
320 which found the majority (83%) of patients to be owning mobile phones (18). The prevalence  
321 is also significantly lower as compared to another study conducted in the US which found it  
322 comparable to ownership among US adults (19).

323 Additionally, the study found only about 10 participants to be owning smartphones contrary to  
324 another study which found a higher prevalence (57%) of smartphone ownership among people  
325 with substance use disorder (18). Higher prevalence of mobile phone ownership is observed  
326 among participants from the urban area as compared to the rural area ( $p < 0.001$ ). This finding  
327 is also observed in other studies and is evidenced by the better social-economic activities,  
328 access to opportunities and the general economic status of the urban areas as compared to the  
329 rural areas (16,20). Moreover, the majority of the participants are found to be living with a  
330 family member, friend or a relative owning a mobile phone. This provides an opportunity to  
331 many PWDUD who do not own personal mobile phones to access digital health services and  
332 information on drug use, as they can be supported by family members owning mobile phones  
333 (21).

334 In this study about three quarters of the participants were found to be able to keep mobile  
335 phones for more than one year, however, the majority are observed to sell them frequently as  
336 evidenced from the interviews. Almost all the participants from both areas are also found to  
337 show readiness in using mobile phones to access information about substance use effects and  
338 treatment options. The use of mobile apps as an intervention for substance is still relatively a  
339 new concept, with the first app in the field of substance use targeted alcohol use and was  
340 developed around 2011 (22). A randomized trial to assess a smartphone application to support  
341 recovery from alcoholism showed that multi-featured smartphone application may have  
342 significant benefits to patients in continuing care for alcohol use disorder which is in line with  
343 what we have found in this study the app needs to go beyond information sharing (23). Given  
344 the novelty of this field, there is still more work to be done so as to develop working  
345 applications as the systematic review by Staigner et al. revealed that less than one third of the  
346 apps they studied showed mobile app users were in significantly better than the comparison  
347 conditions post treatment (24).

348 From this study and other studies as discussed, it is evident that, there is a potential of  
349 deploying mHealth interventions among people with drug use disorder in these respective study  
350 areas and even beyond. However, there are three things to consider in the deployment of the  
351 app. First, the app should be able to work in both smart phones and non-smart phones, second,  
352 the app should not only target PWDUD but the community at large which will be useful in  
353 helping PWDUD with no phones to access information, understand the impact of substance  
354 use and hence prevent other community members to start substance use and thirdly, there  
355 should be a supporting institution behind the app with accessible information centers in the  
356 community. Several studies have recommended the use of internet and computer-based forms  
357 of interventions to PWDUD as they have proved to have similar outcomes as compared to the  
358 traditional in-person approaches (25–27).

### 359 **Strengths and Limitations**

360 A strength in this study is that it is the first study done in Tanga Region and Tanzania examining  
361 the potential of using mHealth interventions to increase information availability and connecting  
362 people with substance use disorders to appropriate services. The study employed a mixed  
363 method design which ensured gathering of sufficient evidence through triangulation. This study  
364 therefore lies groundwork for similar studies and provides information on how to design  
365 working digital health interventions for people with drug use disorders and their families in  
366 Tanzania. Further, through this study a digital health tool called HuruApp was developed.

367 Besides the strengths of this study, several limitations are noted. Due to stigma, the provision  
368 of socially desirable answers because of fear, may have resulted in response bias as substance  
369 use is a sensitive subject and is perceived illegal in Tanzanian communities. The study was  
370 only limited to two districts of Tanga region which were within the scope of the planned  
371 campaign on addressing substance use. Given limited time constraints, the qualitative  
372 component was not explored in full depths, it was added as an element to generate quantitative  
373 findings with context.

### 374 **Conclusion**

375 A high proportion of PWDUD in Tanga own a mobile phone, an opportunity for integrating  
376 both physical and digital interventions in addressing substance use. This platform can be used  
377 to bridge knowledge and practice gaps towards substance use. In addition, the readiness to use  
378 such platform is high, and PWDUD showed readiness to use mobile phones to learn about



379 substance use and substance use disorders. There is also an opportunity for the whole-  
380 community approach if targeted by information and messages aligning drug use knowledge,  
381 intervention, and harm reduction practices to address the burden of drug use in Tanga and areas  
382 with similar contexts. Evidence from this study enabled tailored mobile application  
383 development, the Huru app intervention has been developed to enhance sharing information  
384 and locating services for people with substance use. Studies to assess the effectiveness of this  
385 and other mHealth interventions in supporting recovery and treatment for PWDUD are  
386 warranted.

### 387 **Competing Interests**

388 The authors declare no competing interests.

### 389 **Disclaimer**

390 Anja Busse, Sanita Suhartono and Giovanna Campello are staff members of the United  
391 Nations. The views reflected in the article are those of the authors and do not necessarily reflect  
392 the views of the United Nations.

### 393 **Acknowledgement**

394 We appreciate the support of the Muhimbili University of Health and Allied Sciences  
395 (MUHAS) staff for mentorship and logistics support. We further extend our gratitude to the  
396 Regional Medical Officer (RMO) of Tanga Region and District Medical Officers (DMOs) of  
397 Tanga city and Muheza district for their incredible support during data collection. We  
398 appreciate the contribution of Dr Wallace Karata, Ms Irene Kaoneka, Mr Lupiana Hare, Mr.  
399 Said Bandawe and his team from the Gift of Hope Foundation for their support during field  
400 work in Tanga and Muheza. We would like to specially thank our research assistants and all  
401 study participants.

### 402 **Funding**

403 The study was funded by the United States Bureau of International Narcotics and Law  
404 Enforcement Affairs US/INL through the United Nations Office on Drugs and Crime  
405 (UNODC) and its implementing partner, the Association Casa Famiglia Rosetta during an  
406 Information, Education, Communication (IEC) campaign named "*Awareness in a Caring*  
407 *Community,*" for the project "*Improving the Capacity of the System of Drug Use Disorders*

408 *Treatment Services to Provide Ethical, Evidence-Based and Humane Treatment to Persons*  
409 *with Drug Use Disorders in Tanga, Tanzania”* conducted in Tanga Region, Tanzania in 2019-  
410 2022.

411 **References**

- 412 1. United Nations Office on Drugs and Crime (UNODC). Booklet 2: Drug Use and Health  
413 Consequences. 2020.
- 414 2. Charlson FJ, Diminic S, Lund C, Degenhardt L, Whiteford HA. Mental and Substance  
415 Use Disorders in Sub-Saharan Africa: Predictions of Epidemiological Changes and  
416 Mental Health Workforce Requirements for the Next 40 Years. *PLoS One* [Internet].  
417 2014 Oct 13 [cited 2022 Oct 15];9(10):110208. Available from:  
418 /pmc/articles/PMC4195720/
- 419 3. Ratliff EA, McCurdy SA, Mbwambo JKK, Lambdin BH, Voets A, Pont S, et al. An  
420 Overview of HIV Prevention Interventions for People Who Inject Drugs in Tanzania.  
421 *Adv Prev Med*. 2013;2013:1–6.
- 422 4. Ndayongeje J, Msami A, Laurent YI, Mwankemwa S, Makumbuli M, Ngonyani AM,  
423 et al. Illicit Drug Users in the Tanzanian Hinterland: Population Size Estimation  
424 Through Key Informant-Driven Hot Spot Mapping. *AIDS Behav*. 2018 Jul 1;22(Suppl  
425 1):4–9.
- 426 5. Booth RE, Watters JK, Chitwood DD. HIV risk-related sex behaviors among injection  
427 drug users, crack smokers, and injection drug users who smoke crack. *Am J Public*  
428 *Health*. 1993;83(8):1144.
- 429 6. Wilson K. Mobile cell phone technology puts the future of health care in our hands.  
430 *CMAJ*. 2018;3:378–87.
- 431 7. Bandawar M, Narasimha VL, Chand P. Use of digital technology in addiction  
432 disorders. *Indian J Psychiatry*. 2018 Feb 1;60(Suppl 4):S534.
- 433 8. Naslund JA, Aschbrenner KA, Araya R, Marsch LA, Unützer J, Patel V, et al. Digital  
434 technology for treating and preventing mental disorders in low-income and middle-  
435 income countries: a narrative review of the literature. *Lancet Psychiatry*.  
436 2017;4(6):486–500.
- 437 9. United Nations Office on Drugs and Crime. Prevention of drug use and treatment of  
438 drug use disorders in rural settings. 2017.
- 439 10. Mwambungu PH, Andrea D, Katomero J. Using mobile phones in improving mental  
440 health services delivery in Tanzania: a feasibility study at Mirembe National Mental  
441 Health Hospital in Dodoma. *Journal of Global Health Science*. 2019;1(1):1–8.
- 442 11. MOHCDGEC. Digital Health Strategy July 2019- June 2024. 2019;(July).
- 443 12. TIC. Tanga Region Investments Profiles.
- 444 13. Leslie Kish. Survey Sampling (New York: John Wiley & Sons). *American*  
445 *Political Science Review*. 2013/09/02. 1965;59(4):1025.
- 446 14. Githae M. Knowledge On Use And Effects Of Drug And Substance Abuse Among  
447 Youth Aged 13 To 24 Years In Raila Village, Kibera Slum, Nairobi, Kenya. 2018 Oct;
- 448 15. R Core Team. R: A Language and Environment for Statistical Computing. Vienna,  
449 Austria: R Foundation for Statistical Computing; 2020.
- 450 16. Marron O, Thomas G, Burdon Bailey JL, Mayer D, Grossman PO, Lohr F, et al.  
451 Factors associated with mobile phone ownership and potential use for rabies  
452 vaccination campaigns in southern Malawi. *Infect Dis Poverty*. 2020;9(1):1–11.
- 453 17. Janicijevic KM, Kocic SS, Radevic SR, Jovanovic MR, Radovanovic SM.  
454 Socioeconomic factors associated with psychoactive substance abuse by adolescents in  
455 Serbia. *Front Pharmacol*. 2017;8(JUN):1–6.
- 456 18. Milward J, Day E, Wadsworth E, Strang J, Lynskey M. Mobile phone ownership, usage  
457 and readiness to use by patients in drug treatment. *Drug Alcohol Depend*.  
458 2015;146(1):111–5.

- 459 19. Jennifer Dahne JS, Lejuez CW. Smartphone and Mobile Application Utilization Prior  
460 to and Following Treatment Among Individuals Enrolled in Residential Substance Use  
461 Treatment. *J Subst Abuse Treat.* 2015;58:95–9.
- 462 20. Domek GJ, Contreras-Roldan IL, Asturias EJ, Bronsert M, Bolaños Ventura GA,  
463 O’Leary ST, et al. Characteristics of mobile phone access and usage in rural and urban  
464 Guatemala: assessing feasibility of text message reminders to increase childhood  
465 immunizations. *Mhealth.* 2018;4:9–9.
- 466 21. Clark RE. Family support and substance use outcomes for persons with mental illness  
467 and substance use disorders. *Schizophr Bull.* 2001;27(1):93–101.
- 468 22. Kim J, Ryu D, Park J, Kim H, Yu Y. Development of an android application for  
469 sobriety test using bluetooth communication. *Communications in Computer and*  
470 *Information Science [Internet].* 2011 [cited 2022 Dec 30];263 CCIS(PART 2):203–9.  
471 Available from: [https://link.springer.com/chapter/10.1007/978-3-642-27186-1\\_26](https://link.springer.com/chapter/10.1007/978-3-642-27186-1_26)
- 472 23. Gustafson DH, McTavish FM, Chih MY, Atwood AK, Johnson RA, Boyle MG, et al.  
473 A smartphone application to support recovery from alcoholism: A randomized  
474 controlled trial. *JAMA Psychiatry [Internet].* 2014 May 5 [cited 2022 Dec  
475 30];71(5):566. Available from: [/pmc/articles/PMC4016167/](https://pubmed.ncbi.nlm.nih.gov/24016167/)
- 476 24. Staiger PK, O’Donnell R, Liknaitzky P, Bush R, Milward J. Mobile Apps to Reduce  
477 Tobacco, Alcohol, and Illicit Drug Use: Systematic Review of the First Decade. *J Med*  
478 *Internet Res [Internet].* 2020 Nov 1 [cited 2022 Dec 30];22(11). Available from:  
479 <https://pubmed.ncbi.nlm.nih.gov/33231555/>
- 480 25. Kooreman HE, Greene MS. Substance Abuse in Indiana : An Urban-Rural Perspective.  
481 2017;(June):20.
- 482 26. Batastini AB, King CM, Morgan RD, McDaniel B. Telepsychological services with  
483 criminal justice and substance abuse clients: A systematic review and meta-analysis.  
484 *Psychol Serv.* 2016;13(1):20–30.
- 485 27. Kay-Lambkin FJ, Baker AL, Lewin TJ, Carr VJ. Computer-based psychological  
486 treatment for comorbid depression and problematic alcohol and/or cannabis use: A  
487 randomized controlled trial of clinical efficacy. *Addiction.* 2009;104(3):378–88.  
488  
489
